# Supplementary material
Source: Springer Nature journal article supplement (https://www.springermedizin.de/resource/supplementary/13052_2013_330_MOESM1_ESM.pdf/9671876)
Supplement: MOESM1 [file 9671876]

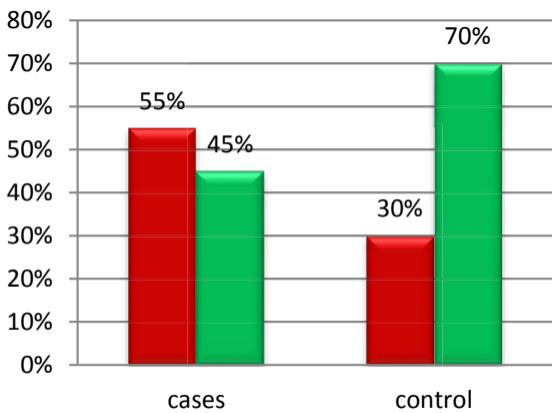

- vitamin D deficient subjects
- subjects with normal vitamin D level

**vitamin D status among studied subjects ( $p < 0.01$ )**
